# Supplementary material for: Elevation of Donor-derived Cell-free DNA Before Biopsy-proven Rejection in Kidney Transplant
Source: PubMed Central journal article supplement — Transplantation. 2024 Aug 20;108(9):1994–2004. doi: 10.1097/TP.0000000000005007 (PMC11335081; doi:10.1097/tp.0000000000005007), 2024-08-20
Supplement: tpa-108-1994-s001.pdf [file tpa-108-1994-s001.pdf]

**Supplementary Materials for:**  
**Elevation of donor-derived cell-free DNA prior to biopsy proven rejection in kidney transplant**

**Authors:** Jonathan S. Bromberg, MD, PhD<sup>1</sup>; Suphamai Bunnapradist, MD, MS<sup>2</sup>; Milagros Samaniego-Picota, MD<sup>3</sup>; Sanjiv Anand, MD<sup>4</sup>; Erik Stites, MD<sup>5</sup>; Philippe Gauthier, MD, MBA<sup>6</sup>; Zachary Demko, PhD<sup>6</sup>; Adam Prewett, MBA<sup>6</sup>; Madeleine Armer-Cabral, MS<sup>6</sup>; Kyle Marshall, MS<sup>6</sup>; Navchetan Kaur, PhD<sup>6</sup>; Michelle S. Bloom, PhD<sup>6</sup>; Hossein Tabriziani, MD<sup>6</sup>; Sangeeta Bhorade, MD<sup>6</sup>; Matthew Cooper, MD<sup>7</sup> on behalf of the ProActive investigators\*

**Affiliations:**

1. University of Maryland, School of Medicine, Department of Surgery, Baltimore, MD, USA.
2. UCLA School of Medicine, Los Angeles, CA, USA
3. Henry Ford Transplant Institute, Detroit, MI, USA
4. Intermountain Healthcare, Salt Lake City, UT, USA
5. University of Colorado Anschutz Medical Campus, School of Medicine, Denver, CO, USA
6. Natera, Inc. Austin, TX, USA
7. Medical College of Wisconsin, Milwaukee, WI, USA

\* A full list of the ProActive investigators is included under Acknowledgments, and in Table S1.

## Supplementary Figures

**Figure S1:** Histogram showing propensity scores of the AKP1631 cohort and the subcohort used in this study. Propensity scores (probabilities) were estimated by fitting a series of three logistic regression models to the study population data and averaging the resultant scores. The data consisted of 55 covariates that included medical procedures or hospitalizations, laboratory measurements, medications, demographics and histology assessments of each patient.

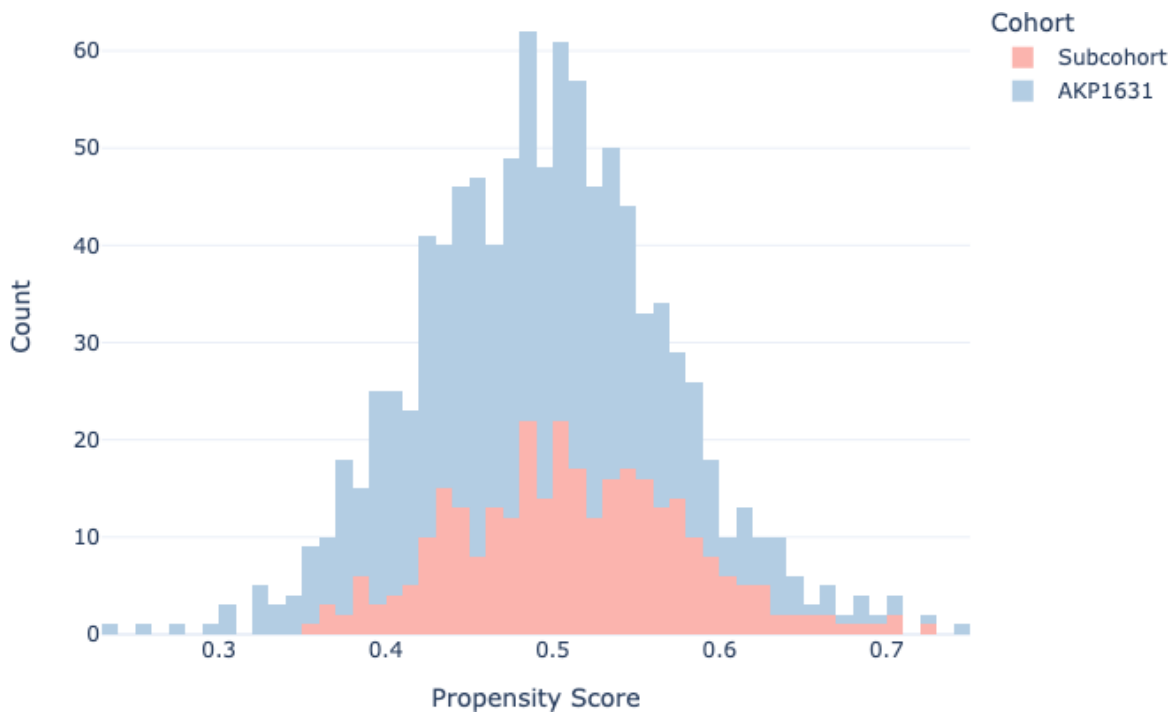

**Figure S2:** dd-cfDNA% trends in patients with a non-rejection biopsy prior to an ABMR biopsy.

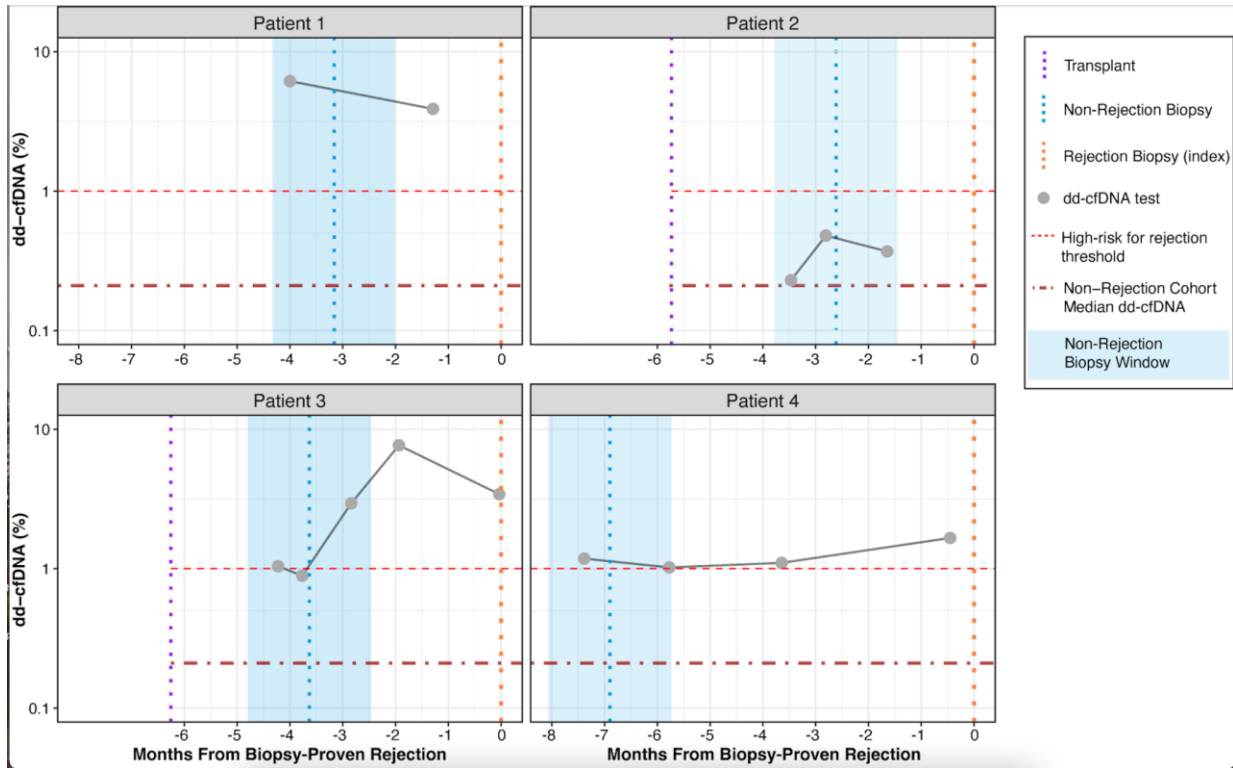

dd-cfDNA test results are plotted for 4 unique patients in the study cohort with a non-rejection biopsy (dotted blue line) within the eight months prior to the index biopsy diagnosing ABMR (dotted orange line). Shaded blue box indicates the 2-month window before and after the non-rejection biopsy.

**Figure S3:** Boxplots for dd-cfDNA measurements drawn within 14 days of biopsy, stratified by biopsy result. P values from Wilcoxon rank-sum test with FDR correction for multiple testing.

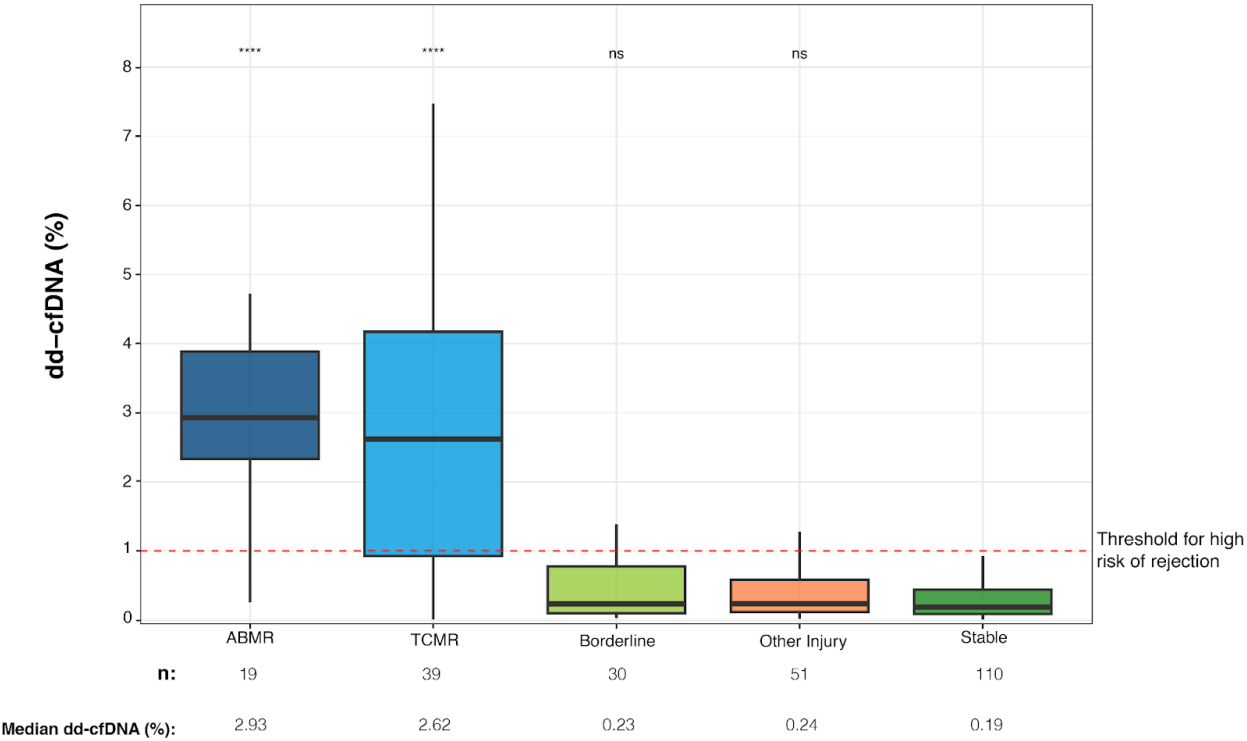

**Figure S4:** AUC for detection of rejection by dd-cfDNA for samples within 14 days of biopsy. (N = 249 samples; 58 Rejection, 191 non-rejection)

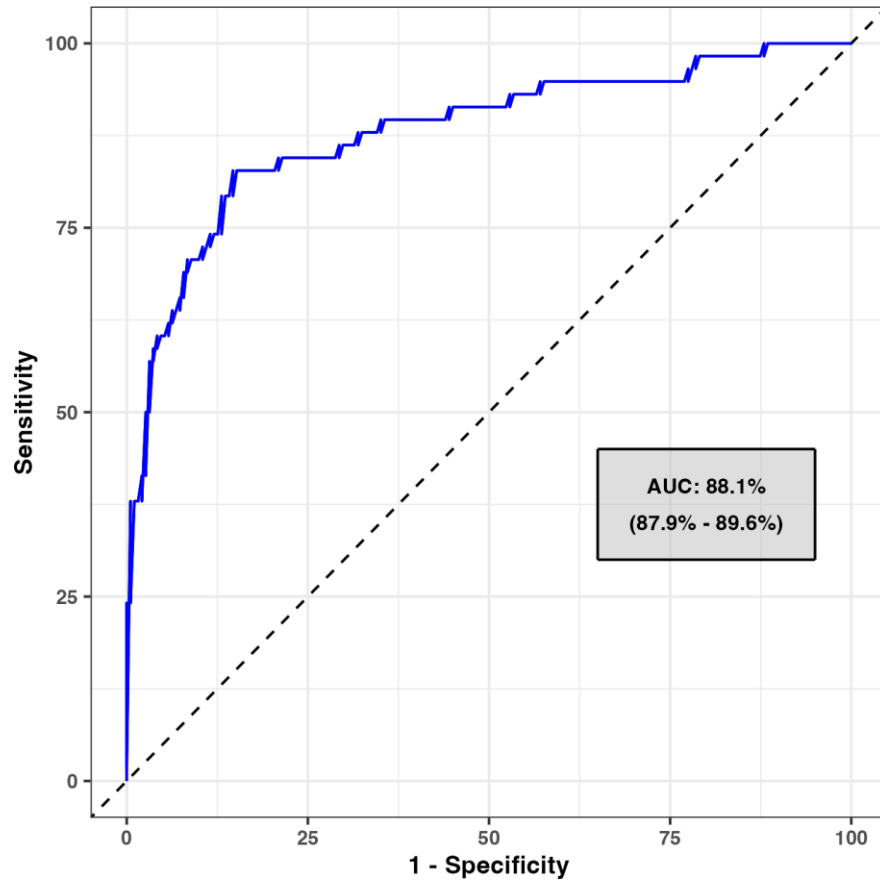

**Table S1:** A list of the ProActive study investigators with their respective centers and the IRB approval protocols numbers. This list represents 40 centers from which the ProActive AKPI 1631 cohort was derived.

| # | Investigator(s)<br>(Credentials)         | Center                                                   | Location (City,<br>State) | Central IRB#                                      | Local IRB#                                                                                           |
|---|------------------------------------------|----------------------------------------------------------|---------------------------|---------------------------------------------------|------------------------------------------------------------------------------------------------------|
| 1 | Jonathan Bromberg<br>(MD, PhD)           | University of Maryland                                   | Baltimore, MD             | Central IRB<br>Advarra Protocol ID<br>Pro00037470 | Human Research<br>Protection Program<br>Study # HP-<br>00087496                                      |
| 2 | Tarek Alhamad<br>(MD, MS, FACP,<br>FASN) | Washington<br>University School<br>of Medicine           | St. Louis, MO             | Central IRB<br>Advarra Protocol ID<br>Pro00037470 | Washington<br>University in St.<br>Louis, Human<br>Research Protection<br>Office, IRB #<br>201909033 |
| 3 | Anup Patel<br>(MD)                       | RWJ Barnabas<br>Medical Center                           | Livingston, NJ            | Central IRB<br>Advarra Protocol ID<br>Pro00037470 | -                                                                                                    |
| 4 | Liise Kayler<br>(MD, MS, FACS)           | Erie County<br>Medical Center                            | Buffalo, NY               | Central IRB<br>Advarra Protocol ID<br>Pro00037470 | University of Buffalo<br>IRB Study #<br>00003845                                                     |
| 5 | Nadiesda Costa<br>(MD, MPH)              | MedStar<br>Georgetown<br>University<br>Hospital          | Washington, DC            | Central IRB<br>Advarra Protocol ID<br>Pro00037470 | -                                                                                                    |
|   | Mathew Cooper<br>(MD)                    |                                                          |                           |                                                   |                                                                                                      |
| 6 | David<br>Wojciechowski<br>(DO)           | University of<br>Texas<br>Southwestern<br>Medical Center | Dallas, TX                | Central IRB<br>Advarra Protocol ID<br>Pro00037470 | UT Southwestern<br>Medical Center IRB,<br>Protocol # STU-<br>2019-1440                               |
| 7 | Milagros<br>Samaniego-<br>Picota (MD)    | Henry Ford<br>Hospital                                   | Detroit, MI               | Central IRB<br>Advarra Protocol ID<br>Pro00037470 | -                                                                                                    |
| 8 | Yasir Qazi<br>(MD)                       | Keck Hospital of<br>USC                                  | Los Angeles, CA           | Central IRB<br>Advarra Protocol ID<br>Pro00037470 | University of<br>Southern California<br>IRB Proposal # HS-<br>19-00746                               |
|   | Neeraj Sharma<br>(MD)                    |                                                          |                           |                                                   |                                                                                                      |
| 9 | Christine Du<br>(MD)                     | Lehigh Valley<br>Health Network                          | Allentown, PA             | -                                                 | Lehigh Valley Health<br>Network IRB ID<br>STUDY00000353                                              |
|   | Michael Moritz<br>(MD)                   |                                                          |                           |                                                   |                                                                                                      |

|    |                                |                                                         |                           |                                                   |                                                          |
|----|--------------------------------|---------------------------------------------------------|---------------------------|---------------------------------------------------|----------------------------------------------------------|
| 10 | Ali Zarrinpar<br>(MD, PhD)     | University of Florida                                   | Gainesville, FL           | Central IRB<br>Advarra Protocol ID<br>Pro00037470 | -                                                        |
| 11 | Thuy Le<br>(MD)                | Legacy Good Samaritan<br>Hospital and<br>Medical Center | Portland, OR              | -                                                 | Legacy Health IRB #<br>1769-2019                         |
|    | William Bennett<br>(MD, FASN)  |                                                         |                           |                                                   |                                                          |
| 12 | Erik Stites<br>(MD)            | University of Colorado                                  | Aurora, CO                | Central IRB<br>Advarra Protocol ID<br>Pro00037470 | -                                                        |
| 13 | Richard Fatica<br>(MD)         | Cleveland Clinic                                        | Cleveland, OH             | -                                                 | Cleveland Clinic IRB<br># 19-1610                        |
| 14 | Henry Randall<br>(MD)          | Saint Louis<br>University<br>Hospital                   | Saint Louis, MO           | Central IRB<br>Advarra Protocol ID<br>Pro00037470 | -                                                        |
| 15 | Muna Alnimri<br>(MBBS)         | University of California Davis                          | Sacramento, CA            | Central IRB<br>Advarra Protocol ID<br>Pro00037470 | -                                                        |
| 16 | Anil Chandraker<br>(MD, MBChB) | Brigham and<br>Women's<br>Hospital                      | Chestnut Hill, MA         | Central IRB<br>Advarra Protocol ID<br>Pro00037470 | -                                                        |
| 17 | Lewis Teperman<br>(MD)         | Northwell Health                                        | Manhasset, NY             | Central IRB<br>Advarra Protocol ID<br>Pro00037470 | -                                                        |
| 18 | Sanjeev Akkina<br>(MD)         | Loyola University                                       | Maywood, IL               | -                                                 | Loyola University<br>Chicago IRB#<br>212638              |
| 19 | Layla Kamal<br>(MD)            | Virginia<br>Commonwealth<br>University                  | Richmond, VA              | WCG IRB Study<br>1282067 IRB #<br>20193133        | -                                                        |
| 20 | Thomas Diflo<br>(MD)           | Westchester<br>Medical Center                           | Westchester<br>County, NY | -                                                 | New York Medical<br>College IRB Protocol<br># 14099      |
| 21 | Sanjiv Anand<br>(MD)           | Intermountain<br>Health Center                          | Salt Lake City, UT        | -                                                 | Intermountain<br>Healthcare<br>Research IRB #<br>1051418 |
| 22 | Neerja Agrawal<br>(MD)         | Cleveland Clinic<br>Florida (Weston)                    | Weston, FL                | -                                                 | Cleveland Clinic IRB<br># 19-1640                        |

|    |                                      |                                                 |                    |                                                   |                                                                                                                              |
|----|--------------------------------------|-------------------------------------------------|--------------------|---------------------------------------------------|------------------------------------------------------------------------------------------------------------------------------|
| 23 | David Leeser<br>(MD)                 | East Carolina<br>University                     | Greenville, NC     | Central IRB<br>Advarra Protocol ID<br>Pro00037470 | East Carolina<br>University, University<br>& Medical Center<br>IRB, Study #<br>UMCIRB 20-000295                              |
| 24 | Fuad Shihab<br>(MD)                  | University of<br>Utah                           | Salt Lake City, UT | -                                                 | University of Utah<br>IRB# 00129786                                                                                          |
| 25 | Edward Walshe<br>(MD)                | Lahey Clinic                                    | Burlington, MA     | Central IRB<br>Advarra Protocol ID<br>Pro00037470 | -                                                                                                                            |
| 26 | Martin Aldana-<br>Campos (MD)        | Tampa General<br>Hospital                       | Fort Myers, FL     | Central IRB<br>Advarra Protocol ID<br>Pro00037470 | -                                                                                                                            |
| 27 | Silas Norman<br>(MD, MPH)            | University of<br>Michigan                       | Ann Arbor, MI      | -                                                 | Office of Human<br>Research Protection<br>IRB # IRB00001995                                                                  |
| 28 | Robert Stratta<br>(MD)               | Wake Forest<br>University Health<br>Sciences    | Winston-Salem, NC  | Central IRB<br>Advarra Protocol ID<br>Pro00037470 | -                                                                                                                            |
| 29 | Nicolae Leca<br>(MD)                 | University of<br>Washington<br>Medical Center   | Seattle, WA        | WCG IRB Study #<br>1281959 IRB #<br>20193133      | -                                                                                                                            |
| 30 | Ayoola Adekile<br>(MD)               | University<br>Medical Center<br>of South Nevada | Las Vegas, NV      | -                                                 | University Medical<br>Center of Southern<br>Nevada IRB # UMC-<br>2020-292                                                    |
| 31 | Suphamai<br>Bunnapradist<br>(MD, MS) | University of<br>California Los<br>Angeles      | Los Angeles, CA    | -                                                 | University of<br>California Los<br>Angeles Office of<br>Human Research<br>Protection Program<br>IRB # 20-000511-<br>AM-00012 |
| 32 | Ekamol<br>Tantisattamo<br>(MD)       | University of<br>California, Irvine<br>Health   | Irvine, CA         | Central IRB<br>Advarra Protocol ID<br>Pro00037470 | -                                                                                                                            |
| 33 | Obi Ekwenna<br>(MD)                  | University of<br>Toledo                         | Toledo, OH         | Central IRB<br>Advarra Protocol ID<br>Pro00037470 | -                                                                                                                            |
| 34 | Arman<br>Faravardeh (MD)             | Balboa United                                   | San Diego, CA      | Central IRB<br>Advarra Protocol ID<br>Pro00037470 | -                                                                                                                            |



|           |                                   |                                                         |                |                                             |                                                        |
|-----------|-----------------------------------|---------------------------------------------------------|----------------|---------------------------------------------|--------------------------------------------------------|
| <b>35</b> | James Sondheimer (MD, FACP, FASN) | Wayne State University                                  | Detroit, MA    | WCG IRB Study # 1297778 IRB # 20193133      | -                                                      |
| <b>36</b> | Shikha Mehta (MD)                 | University of Alabama                                   | Birmingham, AL | Central IRB Advarra Protocol ID Pro00037470 | -                                                      |
| <b>37</b> | Venkatesh Ariyamuthu (MD)         | University of Arizona, Banner University Medical Center | Phoenix, AZ    | Central IRB Advarra Protocol ID Pro00037470 | -                                                      |
| <b>38</b> | Joseph Tremaglio (MD)             | Hartford Hospital                                       | Hartford, CT   | Central IRB Advarra Protocol ID Pro00037470 | -                                                      |
|           | Caroline Rochon (MD)              |                                                         |                |                                             |                                                        |
| <b>39</b> | Scott Westphal (MD)               | University of Nebraska Medical Center                   | Omaha, NE      | Central IRB Advarra Protocol ID Pro00037470 | -                                                      |
| <b>40</b> | Mallika Gupta (MD, FASN)          | University of Kansas Medical Center                     | Lawrence, KS   | -                                           | University of Kansas Medical Center, IRB # IRB00000161 |

**Table S2:** Median dd-cfDNA% (IQR; (25% -75%), in clinically indicated and surveillance biopsies in the month prior to biopsy. P Values from Wilcoxon rank-sum test with FDR correction for multiple testing.

| Biopsy Indication    | Biopsy Type Group1 | AR (N) | Median / IQR dd-cfDNA (%) AR | Non Rej Comparison | Non-rejection (N) | Median / IQR dd-cfDNA (%) Non-rejection | p.adj  | P .adj signif |
|----------------------|--------------------|--------|------------------------------|--------------------|-------------------|-----------------------------------------|--------|---------------|
| Clinically Indicated | TCMR               | 46     | 2.625<br>(1.015-4.405)       | No Rejection       | 121               | 0.31<br>(0.14-0.93)                     | <0.001 | ****          |
|                      | ABMR               | 15     | 2.91<br>(2.7-5.89)           | No Rejection       | 121               | 0.31<br>(0.14-0.93)                     | <0.001 | ****          |
| Surveillance         | ABMR               | 3      | 3.42<br>(2.55-3.63)          | No Rejection       | 65                | 0.18<br>(0.08-0.3)                      | 0.005  | **            |

**Table S3:** Performance metrics indicating Sensitivity, Specificity, NPV, PPV with 95% Clopper Pearson confidence intervals for active rejection within 14 days of biopsy (n = 249biopsies).

| <b>Group</b>              | <b>Sensitivity (%)</b> | <b>Specificity (%)</b> | <b>PPV* (%)</b>   | <b>NPV* (%)</b>   |
|---------------------------|------------------------|------------------------|-------------------|-------------------|
| ABMR<br>(n= 19)           | 94.7 (74.0, 99.9)      | 85.3 (79.5, 90.0)      | 36.6 (22.7, 52.3) | 99.4 (96.8, 1.00) |
| TCMR<br>(n= 39)           | 71.8 (55.1, 85.0)      | 85.3 (79.5, 90.0)      | 30.4 (17.6, 46.0) | 97.1 (93.6, 99.0) |
| All rejections<br>(n= 58) | 79.3 (66.6, 88.8)      | 85.3 (79.5, 90.0)      | 32.6 (20.0, 47.3) | 97.9 (94.8, 99.4) |

\*Calculated using a prevalence of 8.22% based upon AKP 1631 patient cohort.
